# Supplementary material
Source: Springer Nature journal article supplement (https://www.springermedizin.de/resource/supplementary/13012_2012_605_MOESM4_ESM.pdf/9630372)

**Senior Management**

Mentor and Coach

Strategist &  
Negotiator

Goal Setter

Therapist &  
Motivator

Information  
Manager &  
Communicator

Decision  
Maker &  
Problem Solver

*Honesty*  
*Inter-personal Skills*  
*Delegation & Accountability*

**Front Line Workers**

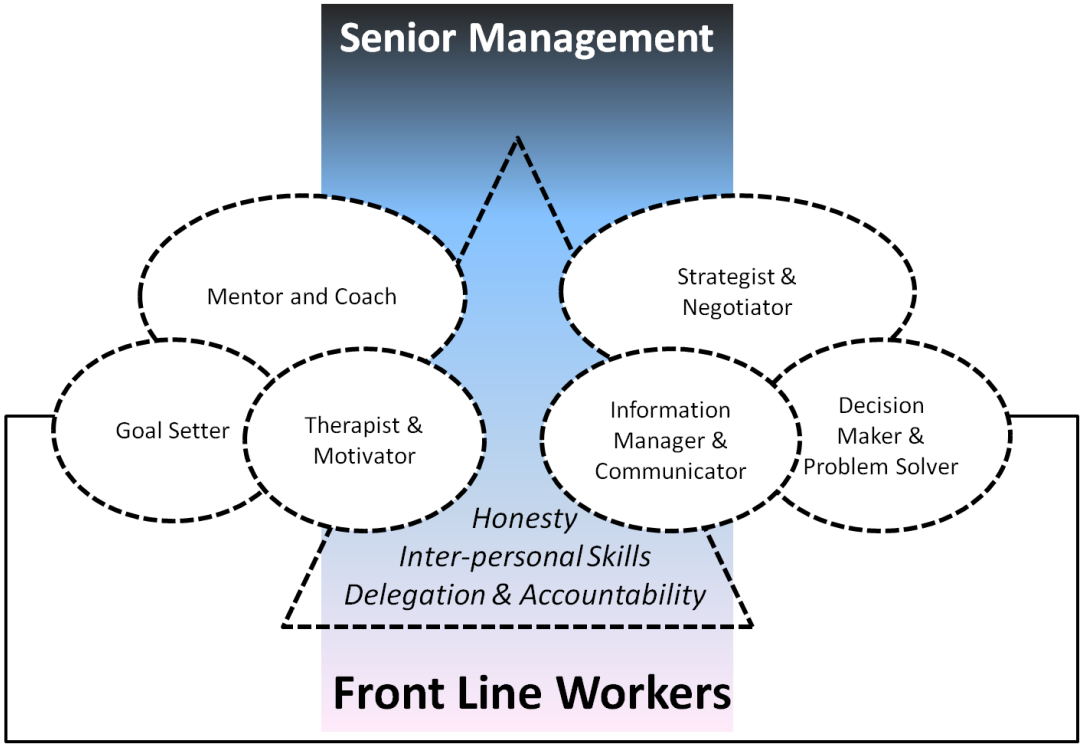

Supplement: MOESM4 [file 9630372]
